# Supplementary material for: The retail food environment and its association with body mass index in Mexico
Source: PubMed Central journal article supplement (PMC8159738; doi:10.1038/s41366-021-00760-2), 2021-02-17

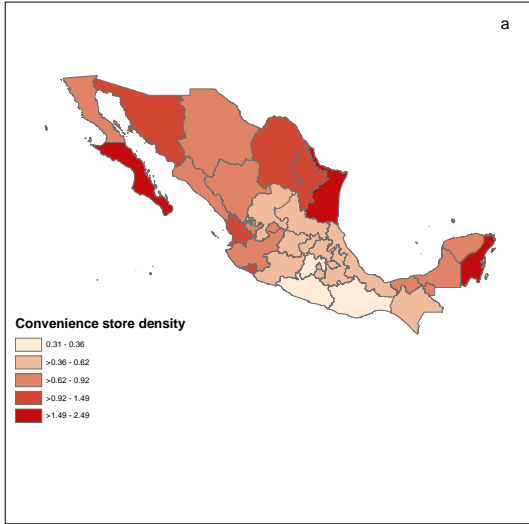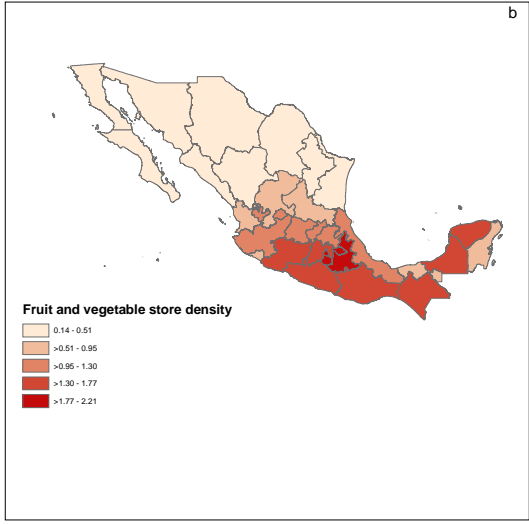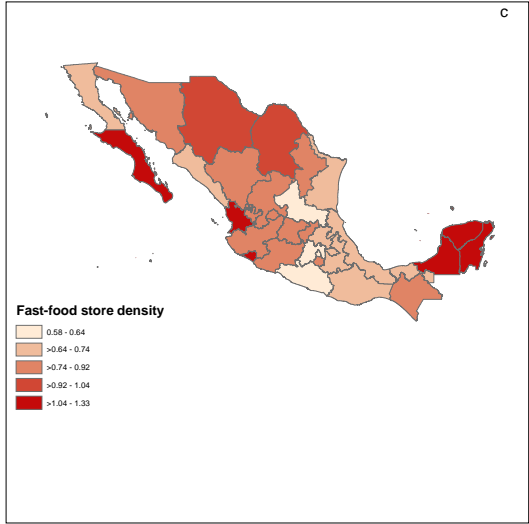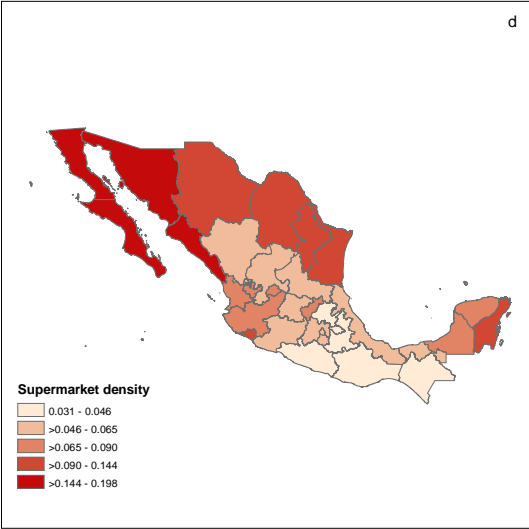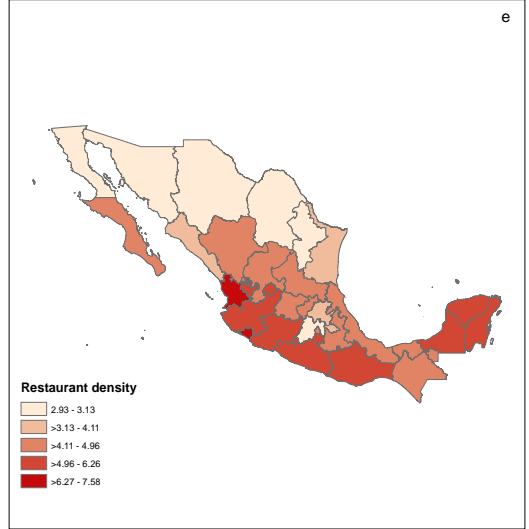

Supplement: 41366_2021_760_MOESM2_ESM.pdf [file 41366_2021_760_MOESM2_ESM.pdf]
